# Supplementary material for: Graphene oxide sheets and quantum dots inhibit α-synuclein amyloid formation by different mechanisms
Source: Royal Society of Chemistry journal article supplement (doi:10.1039/d0nr05003b), 2020-01-01
Supplement: d0nr05003b1.pdf [file d0nr05003b1.pdf]

## Supporting information to

### Graphene oxide sheets and quantum dots inhibit $\alpha$ -synuclein amyloid formation by different mechanisms

Marzyieh Ghaeidamini<sup>1</sup>, David Bernson<sup>1,\*</sup>, Nima Sasanian<sup>1</sup>, Ranjeet Kumar<sup>1</sup>, and Elin K. Esbjörner<sup>1,\*</sup>

<sup>1</sup>Division of Chemical Biology, Department of Biology and Biological Engineering,  
Chalmers University of Technology, Kemivägen 10, S-412 96 Gothenburg, Sweden

\*Corresponding authors

#### SUPPORTING FIGURES

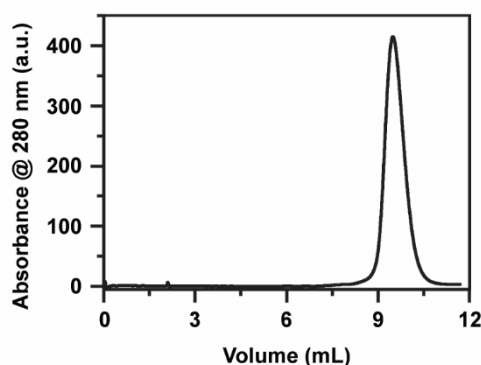

**Supporting figure S1.** Chromatogram showing SEC preparation of monomeric  $\alpha$ -synuclein from recombinant stocks. 4 mg/mL  $\alpha$ -synuclein dissolved in 25 mM Tris buffer, pH 7.6 was injected onto a Superdex 75 GL 10/300 SEC column and eluted with 0.8 mL/min 20 mM Tris buffer, pH 7.4. At these conditions  $\alpha$ -synuclein elutes at approximately 9–10 mL at a concentration of 110  $\mu$ M.

---

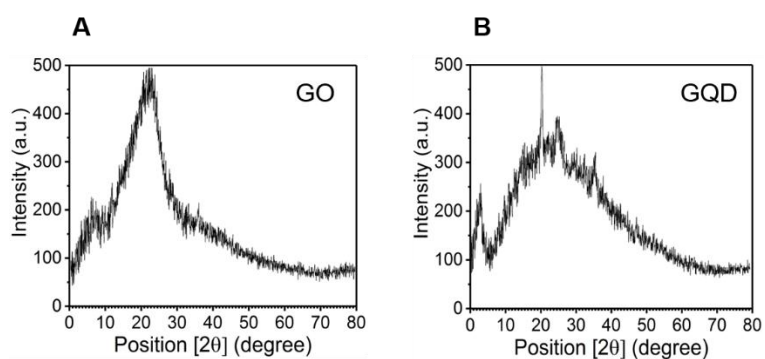

**Supporting figure S2.** X-ray powder diffraction (XRD) patterns of (A) GO and (B) GQD nanoparticles, measured using a X'PertPro Philips diffractometer using Cu K $\alpha$  radiation ( $\lambda=1.5406\text{\AA}$ ) in the  $2\theta$  range 0-80°.

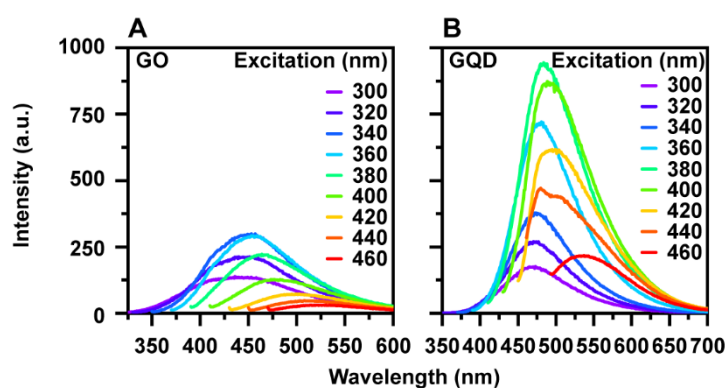

**Supporting figure S3.** Fluorescence emission spectra of (A) GO and (B) GQD nanoparticles at different excitation wavelengths.

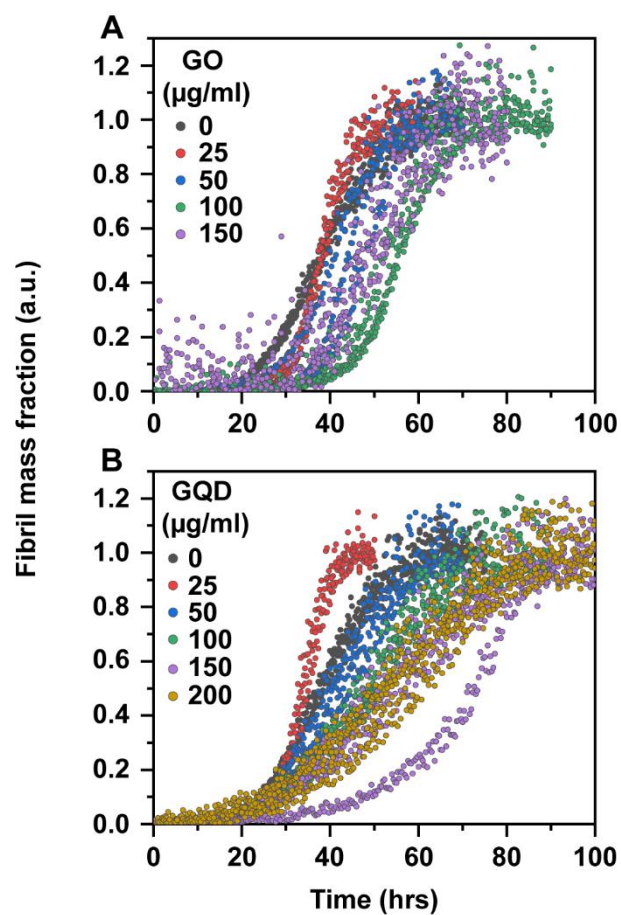

**Supporting figure S4.** Normalised kinetic profiles of 50 μM α-synuclein aggregating in presence of increasing concentrations of **(A)** graphene oxide (GO), and **(B)** graphene quantum dots (GQD).

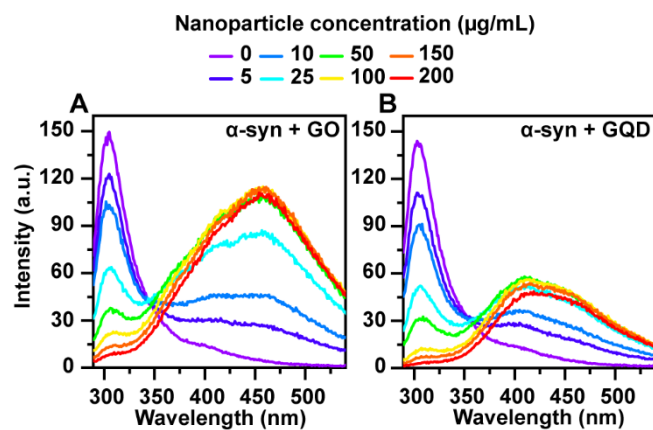

**Supporting figure S5. (A, B)** Unsubtracted fluorescence emission spectrum from 50  $\mu\text{M}$   $\alpha\text{-synuclein}$  with increasing amounts of **(A)** GO, and **(B)** GQD. The tyrosine emission at 310 nm is increasingly quenched by addition of nanoparticles.

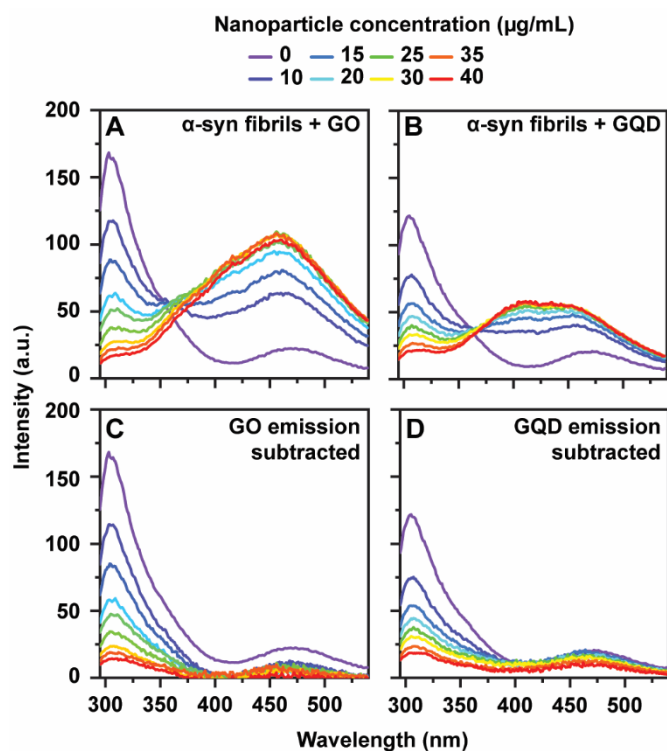

**Supporting figure S6.** (A, B) Fluorescence emission spectrum from 50  $\mu\text{M}$   $\alpha$ -synuclein with increasing amounts of (A) GO, and (B) GQD. The tyrosine emission at 310 nm is increasingly quenched by addition of nanoparticles. (C, D) Same spectra as in (A, B) but with the emission from pure GO (C) and pure GQD (D) subtracted.

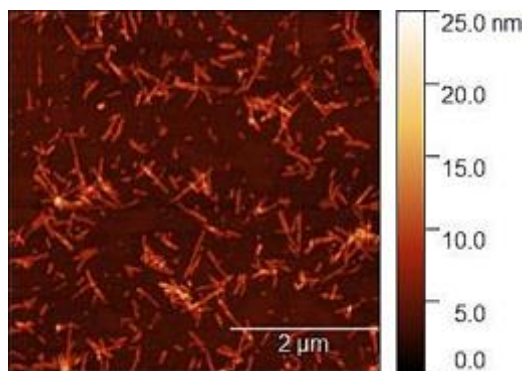

**Supporting figure S7.** AFM image of pre-formed  $\alpha$ -syn fibrils (50  $\mu$ M) recorded 5 hours after the addition of 200  $\mu$ g/ml of GO.

---
